# Supplementary material for: The diversity of ACBD proteins – From lipid binding to protein modulators and organelle tethers
Source: PubMed Central journal article supplement (PMC7057175; doi:10.1016/j.bbamcr.2020.118675), 2020-05
Supplement: mmc2.pdf [file mmc2.pdf]

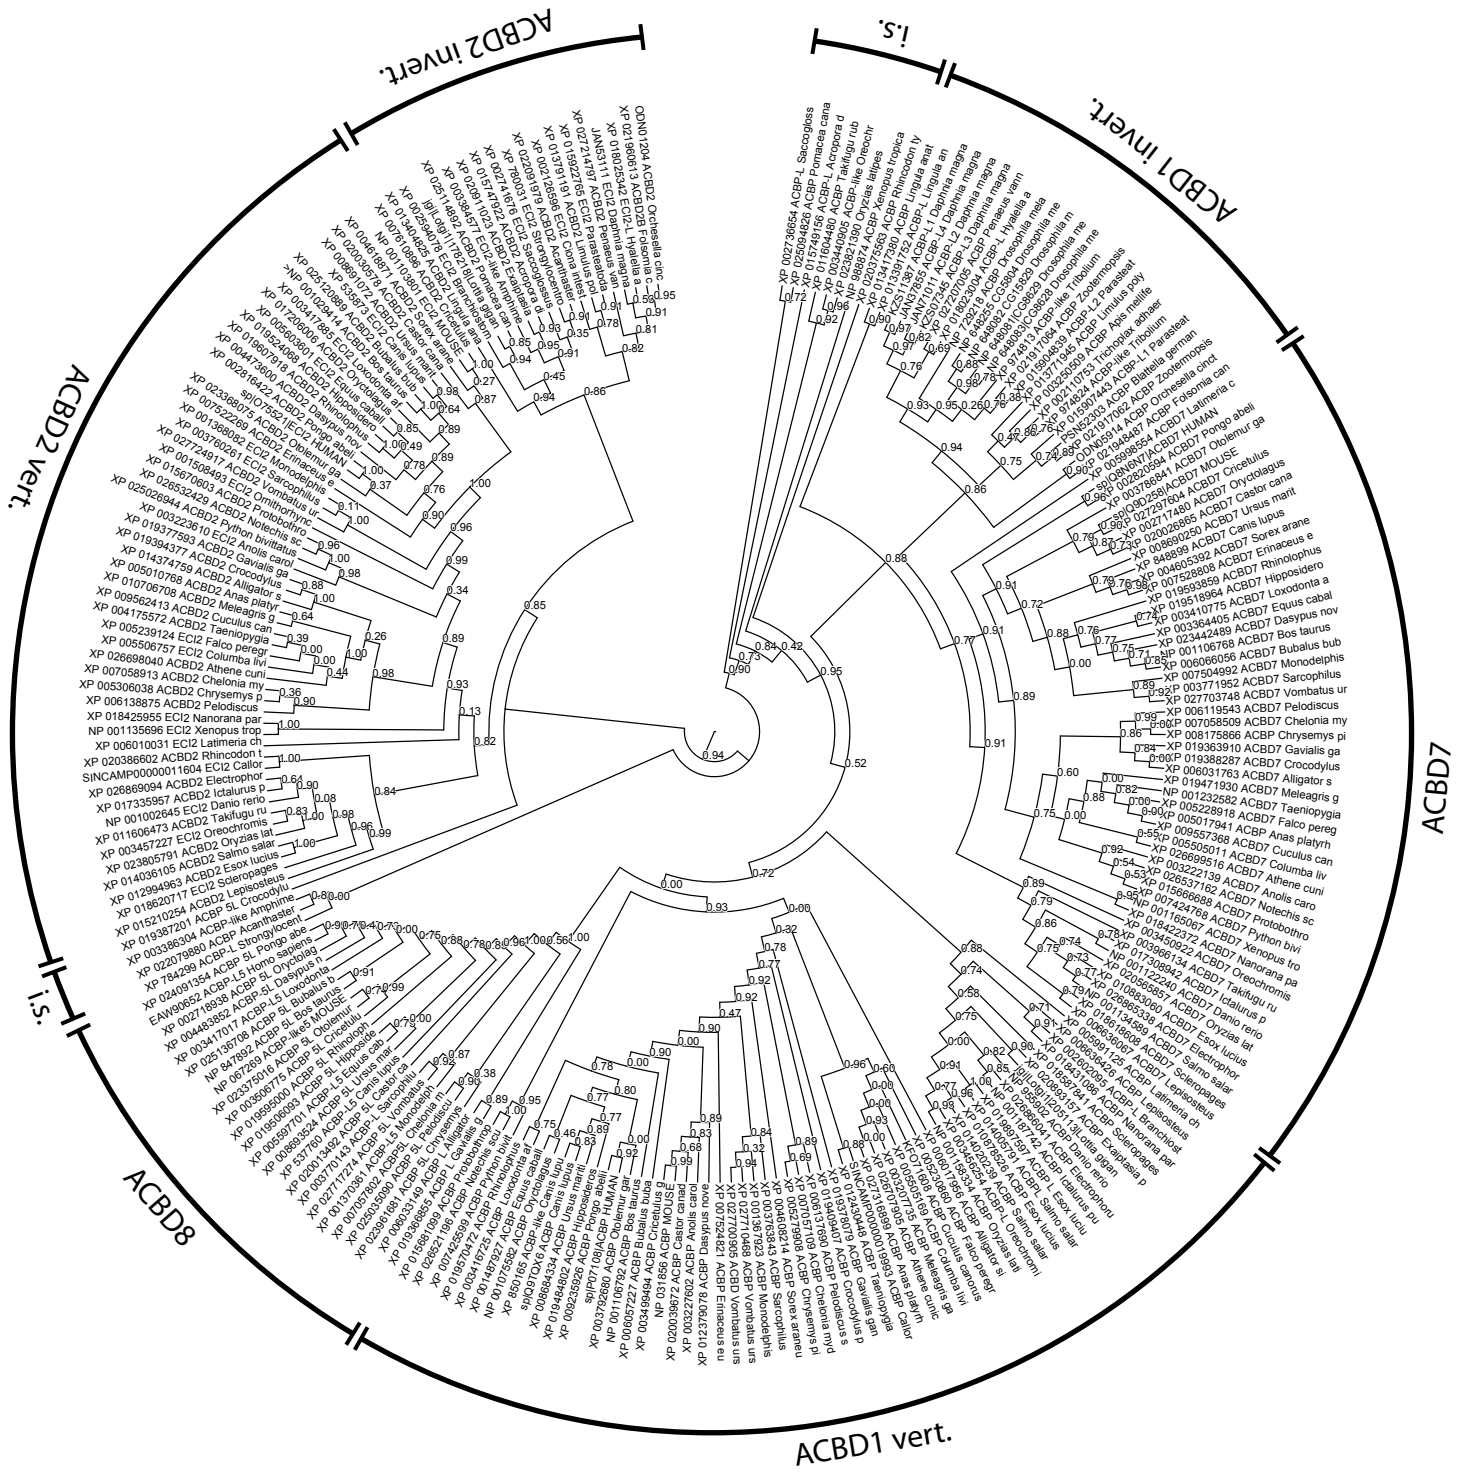

ACBD1 vert.
